# Supplementary material for: Depolymerization of vulcanized poly(cyclopentene), poly(norbornene-ran-cyclopentene) and poly(endo-dicyclopentadiene-ran-cyclopentene) rubbers via ring-closing metathesis depolymerization for monomer recycling
Source: PubMed Central journal article supplement — RSC Adv. 2024 Nov 20;14(50):37143–54. doi: 10.1039/d4ra06914e (PMC11577345; doi:10.1039/d4ra06914e), 2024-11-20
Supplement: RA-014-D4RA06914E-s001.pdf [file RA-014-D4RA06914E-s001.pdf]

Supplementary information for

**Depolymerization of Vulcanized Poly(cyclopentene),  
Poly(norbornene-*ran*-cyclopentene) and Poly(*endo*-  
dicyclopentadiene-*ran*-cyclopentene) Rubbers by Ring-Closing  
Metathesis Depolymerization towards Monomer Recycling**

Shigetaka Hayano\*,<sup>a</sup> Kazuki Kumazawa,<sup>a</sup> Kosuke Isobe,<sup>a</sup> Takuro Sakurai,<sup>a</sup> Shengyang Wang<sup>a</sup>

<sup>a</sup> Zeon Corporation R&D Center, 1-2-1 Yako, Kawasaki-ward, Kawasaki-city, Kanagawa-pref., 210-  
9507, Japan

\* Author for correspondence: e-mail: S.Hayano@zeon.co.jp

**Fig. S1.**  $^{13}\text{C}$  NMR spectrum of poly(CP) described in Table 1.

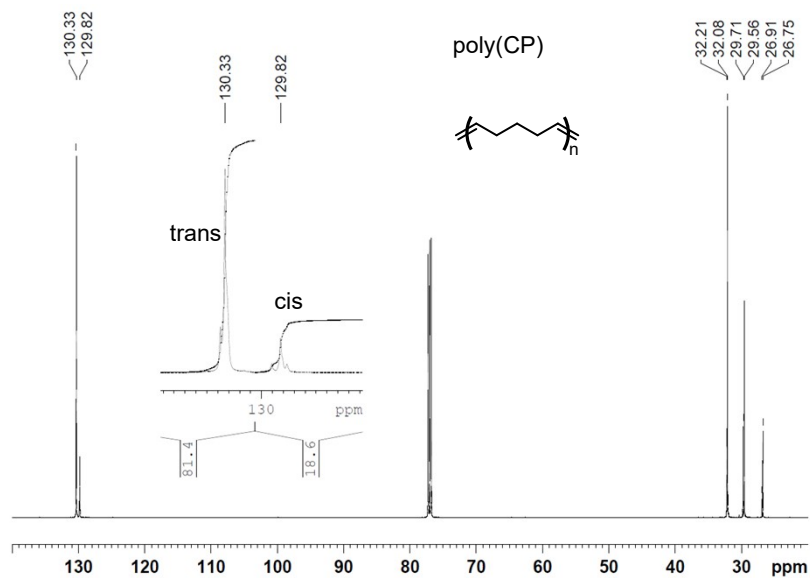

**Fig. S2.**  $^{13}\text{C}$  NMR spectrum of poly(NB-*ran*-CP) described in Table 1.

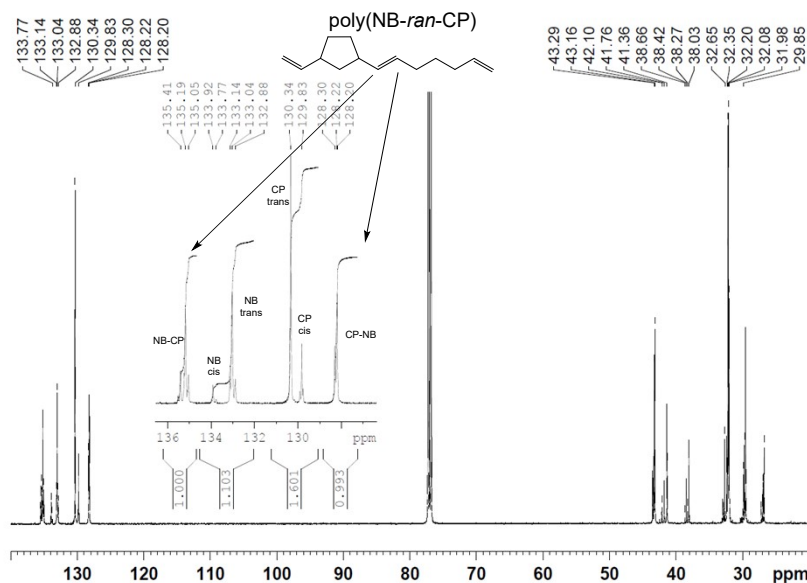

**Fig. S3.**  $^{13}\text{C}$  NMR spectrum of poly(DCP-*ran*-CP) described in Table 1.

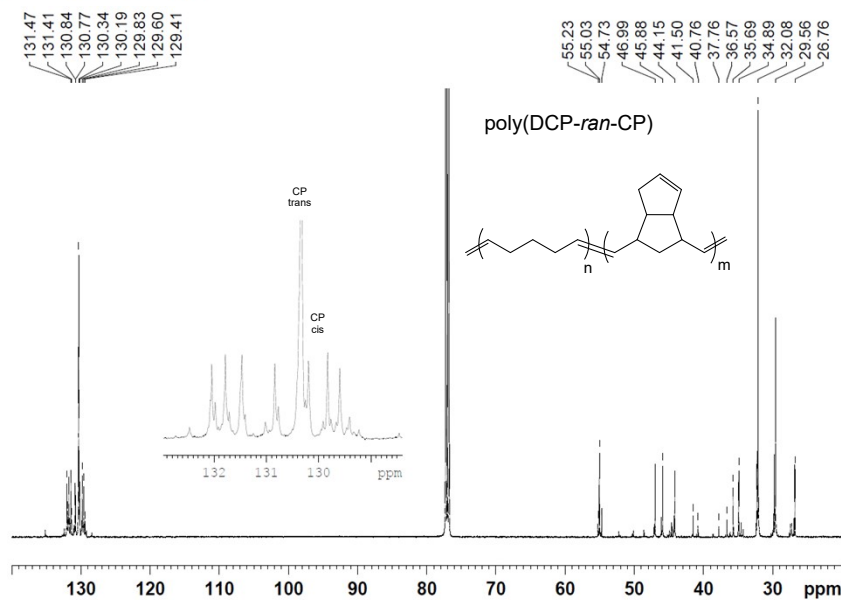

**Fig. S4.** GPC traces of pristine poly(CP) and toluene-extracted part of vulcanized poly(CP) in Table 3.

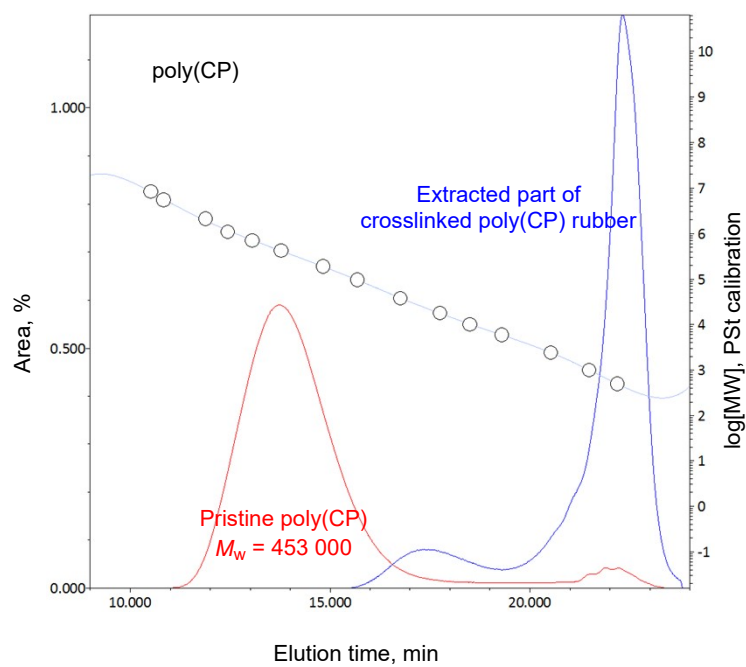

**Fig. S5.** GPC traces of pristine poly(NB-*ran*-CP) and toluene-extracted part of vulcanized poly(NB-*ran*-CP) in Table 3.

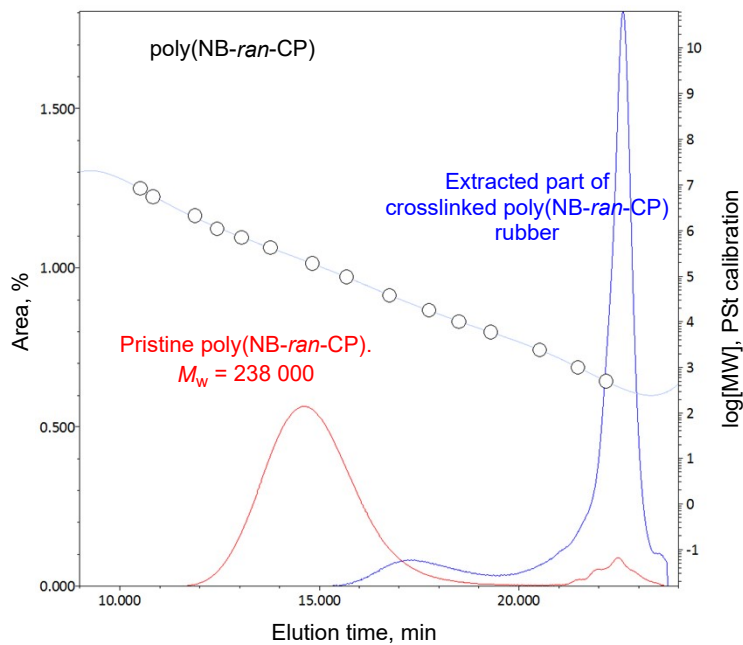

**Fig. S6.** GPC traces of pristine poly(DCP-*ran*-CP) and toluene-extracted part of vulcanized poly(DCP-*ran*-CP) in Table 3.

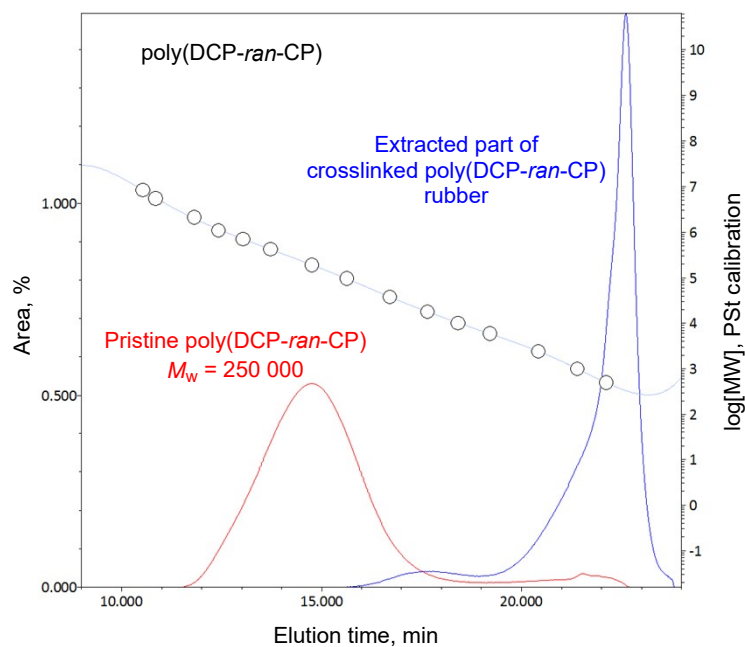

**Fig. S7.**  $^1\text{H}$  NMR spectrum of non-volatile soluble part of depolymerization of poly(CP) described in Table 4.

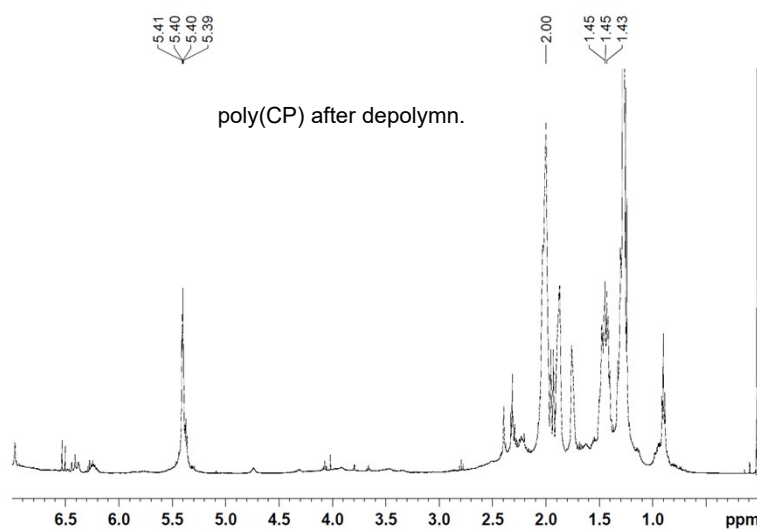

**Fig. S8.**  $^1\text{H}$  NMR spectrum of non-volatile soluble

NMR spectrum of non-

part of depolymerization of poly(NB-*ran*-CP) described in Table 4.

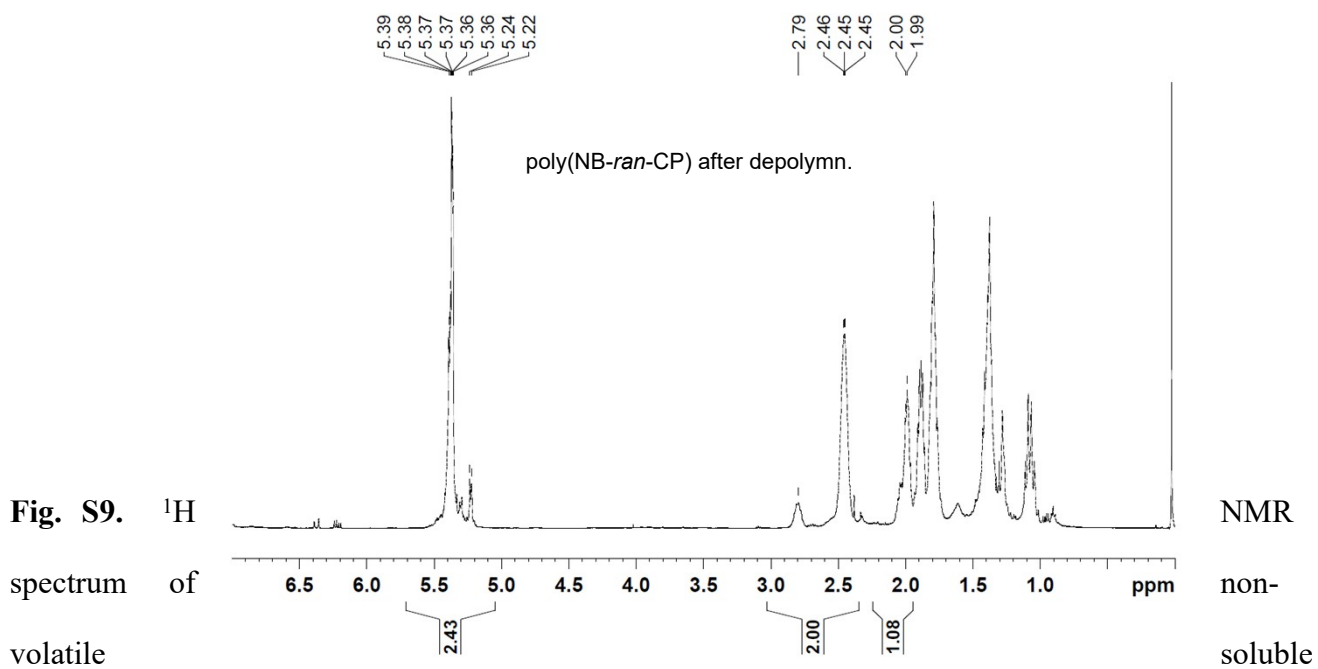

part of depolymerization of poly(DCP-*ran*-CP) described in Table 4.

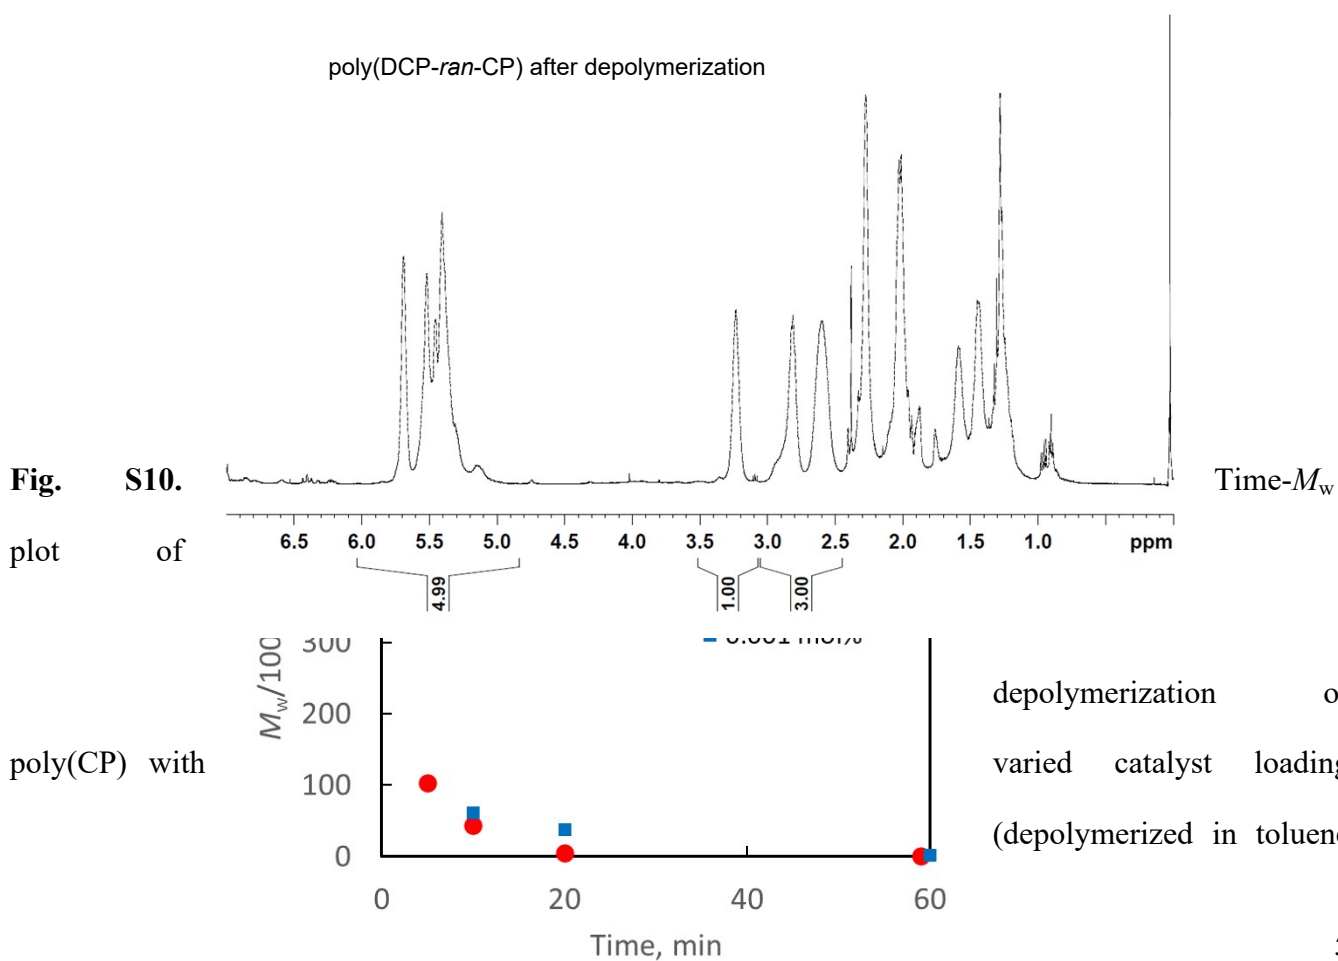

at 25 °C; [total polymer units] = 0.5 M, [(H<sub>2</sub>IMes)(PCy<sub>3</sub>)Cl<sub>2</sub>Ru=CHPh]/[total polymer units]×100 = 0.05 or 0.001 mol%. ).

**Fig. S11.** Time- $M_w$  plot of depolymerization of poly(NB-*ran*-CP) with varied temperature (depolymerized in toluene; [total polymer units] = 0.5 M, [(H<sub>2</sub>IMes)(PCy<sub>3</sub>)Cl<sub>2</sub>Ru=CHPh]/[total polymer units]×100 = 0.05 mol%.)

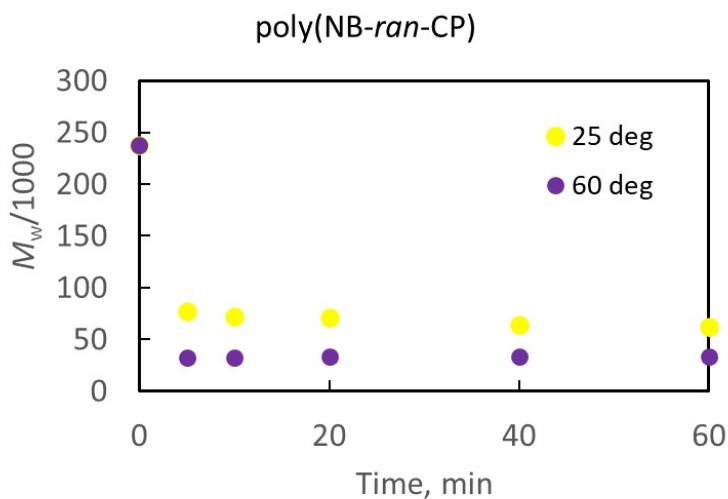

**Fig. S12.** Time- $M_w$  plot of depolymerization of poly(DCP-*ran*-CP) with varied temperature (depolymerized in toluene; [total polymer units] = 0.5 M, [(H<sub>2</sub>IMes)(PCy<sub>3</sub>)Cl<sub>2</sub>Ru=CHPh]/[total polymer units]×100 = 0.05 mol%.)

poly(DCP-ran-CP)

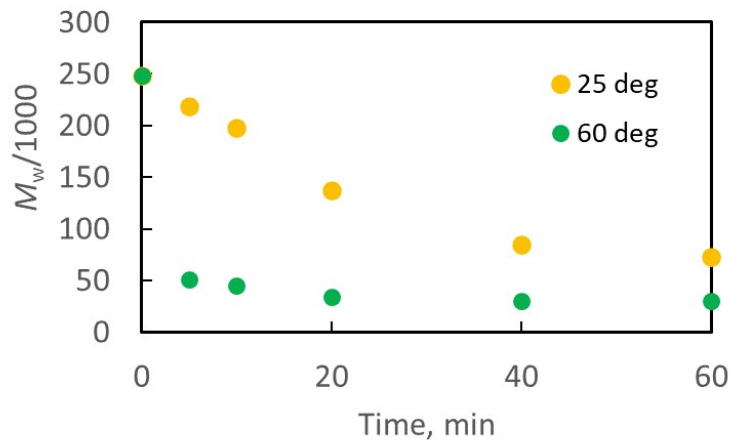

Fig. S13.  $^1\text{H}$  NMR

volatile soluble part

depolymerization of

poly(CP) rubber described in Table 5.

spectrum of non-

of

vulcanized

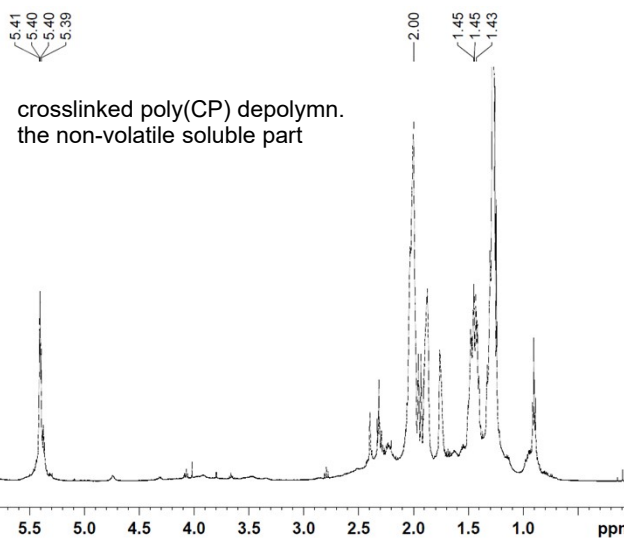

Fig. S14.  $^1\text{H}$

non-volatile

depolymerization of vulcanized poly(NB-ran-CP) described in Table 5.

NMR spectrum of

soluble part of

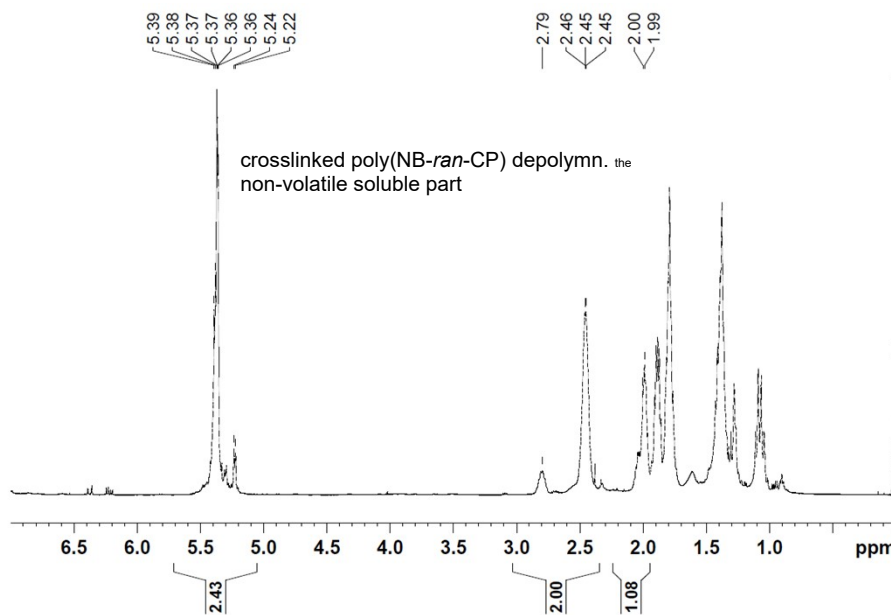

**Fig. S15.**  $^1\text{H}$  NMR spectrum of non-volatile soluble part of depolymerization of vulcanized poly(DCP-*ran*-CP) described in Table 5.

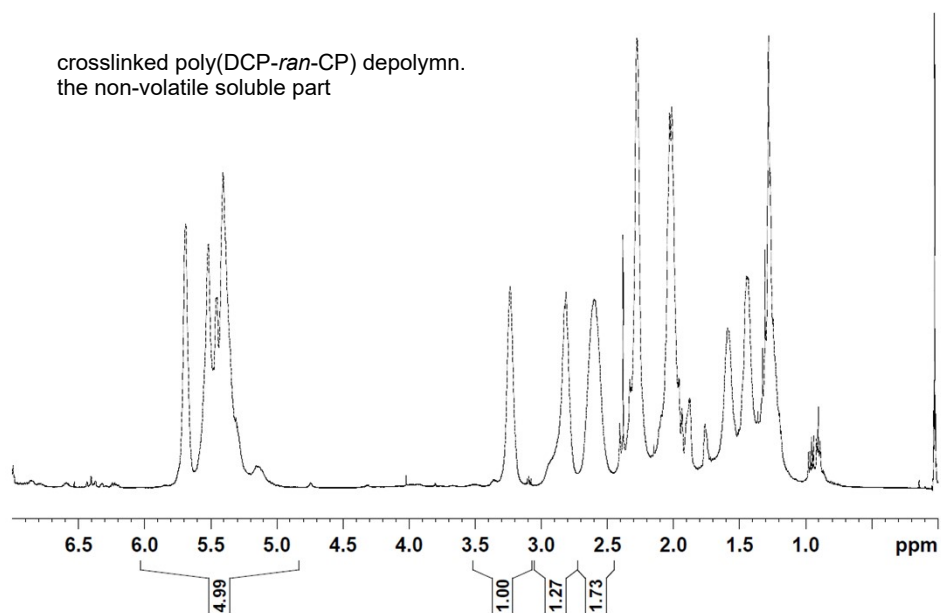

**Fig. S16.** Calibration curve of GC measurement to quantify cyclopentene recovery described in Experimental (Analyses of Polymer and Monomer).

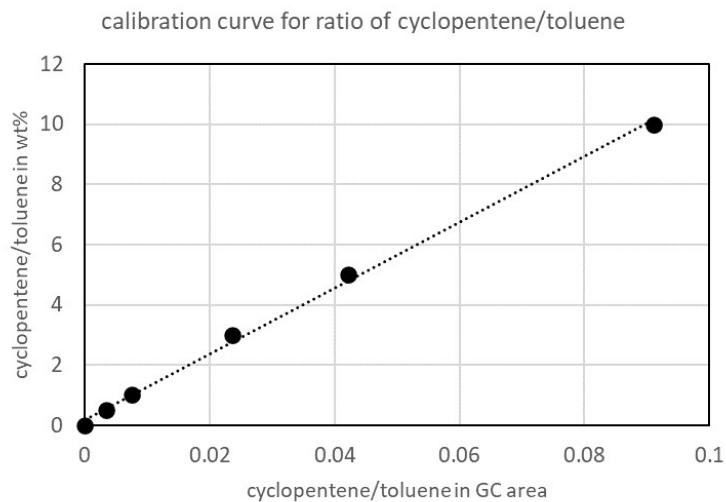



**Fig. S17.** a PDF file of a GC measurement report of depolymerization mixture of pristine poly(NB-*ran*-CP) described in Table 4.

分析日時 : 2024/05/13 12:11:01  
 分析者 : Admin  
 バイアル番号 : 1  
 サンプル名 : 20240509-NCR-THF re  
 サンプルID :  
 サンプルタイプ : 未知  
 注入量 : 1.00  
 内標量 :

データファイル : C:\YGCsolution\Data\Project1\過去\kumazawa\GC2025\220315\_hayano\_kumazawa\202  
 ノットファイル : C:\YGCsolution\Data\Project1\過去\kumazawa\GC2025\p-CPE\_(35degC--280degC)CF

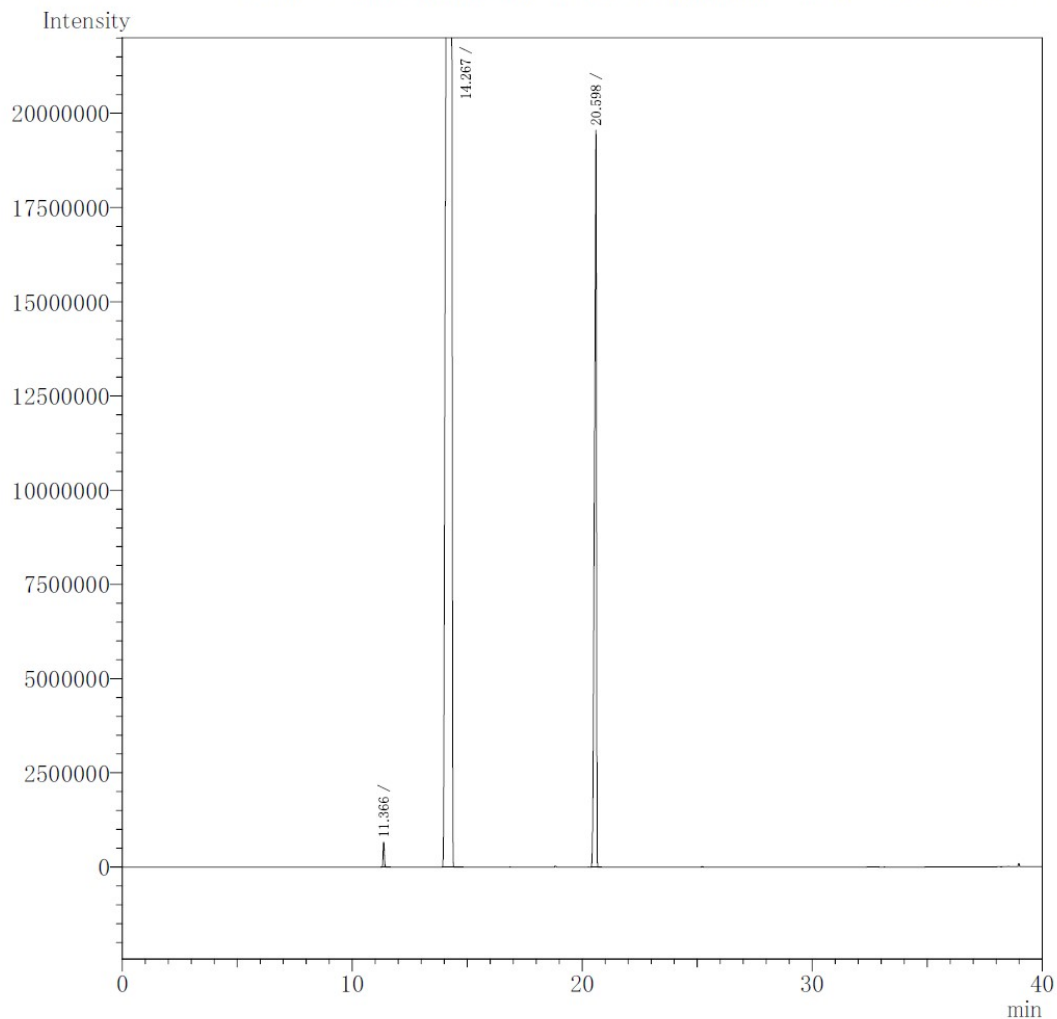

| ピーク番号 | 保持時間   | 面積        | 高さ       | 濃度     | 単位 | マーク ID# | 化合物名 |
|-------|--------|-----------|----------|--------|----|---------|------|
| 1     | 11.366 | 2386009   | 661001   | 0.254  |    |         |      |
| 2     | 14.267 | 816144849 | 62353845 | 86.745 |    |         |      |
| 3     | 20.598 | 122318937 | 19532445 | 13.001 |    |         |      |
| 合計    |        | 940849795 | 82547291 |        |    |         |      |
